# Supplementary material
Source: publisher site journal article supplement (https://www.spandidos-publications.com/7016/downloadSupplementary)
Supplement: Supplementary file 1 [file downloadSupplementary]

## Sheet: Sheet1
Table SIX. Survival significance of the DEGs.
id	HR	HR.95L	HR.95H	P-value
GZMB	0.882619	0.817483	0.952945	0.00141196
CXCL10	0.911952	0.851476	0.976724	0.00847147
CASP1	0.863614	0.782584	0.953033	0.00353475
CXCL11	0.904775	0.849386	0.963775	0.00190443
MMP12	0.902591	0.844196	0.965024	0.00267124
LINC00261	0.87579	0.812749	0.94372	0.000501868
MMP3	0.922303	0.873991	0.973286	0.00321559
CKMT2	0.875786	0.818676	0.936881	0.000115734
SPINK4	0.93798	0.900985	0.976494	0.00181731
